# Supplementary material for: Mass evolution of the Antarctic Peninsula over the last 2 decades from a joint Bayesian inversion
Source: Copernicus journal article supplement (doi:10.5194/tc-16-1349-2022), 2022-04-12
Supplement: Supplementary file 1 [file tc-16-1349-2022-supplement.zip]

Archive with 4 entries (4 files):
- Supplementary_Data_2.nc
- Supplementary_Data_1.xlsx
- tc-16-1349-2022-supplement-title-page.pdf
- Chuter_et_al.pdf
