# Supplementary material for: Mass evolution of the Antarctic Peninsula over the last 2 decades from a joint Bayesian inversion
Source: Copernicus journal article supplement (doi:10.5194/tc-16-1349-2022), 2022-04-12
Supplement: Supplementary file 1 [file tc-16-1349-2022-supplement.zip › tc-16-1349-2022-supplement-title-page.pdf]

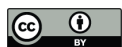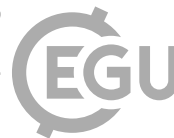

*Supplement of*

**Mass evolution of the Antarctic Peninsula over the last 2 decades from a joint Bayesian inversion**

**Stephen J. Chuter et al.**

*Correspondence to:* Stephen J. Chuter ([s.chuter@bristol.ac.uk](mailto:s.chuter@bristol.ac.uk))

- [tc-16-1349-2022-supplement-title-page.pdf](#)
- [Chuter\\_et\\_al.pdf](#)
- [Supplementary\\_Data\\_1.xlsx](#)
- [Supplementary\\_Data\\_2.nc](#)

The copyright of individual parts of the supplement might differ from the article licence.
